# Supplementary figures and images for: Novel γ-cyclodextrin-based metal–organic frameworks for the effective encapsulation of oregano essential oil and controlled release
Source: Royal Society of Chemistry journal article supplement (doi:10.1039/d3nj00892d), 2023-01-01

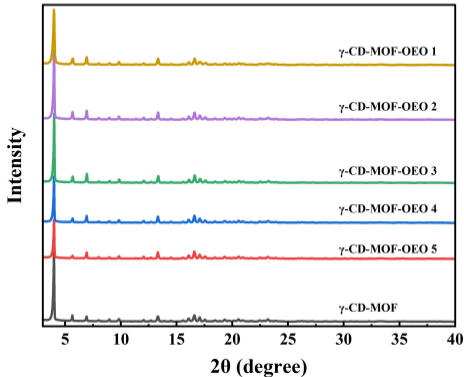

Supplement: d3nj00892d2.pdf [file d3nj00892d2.pdf]

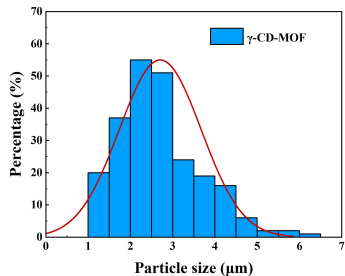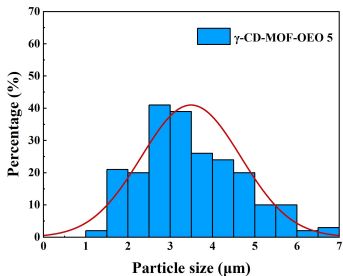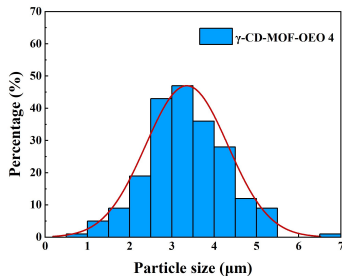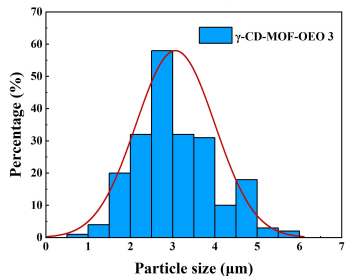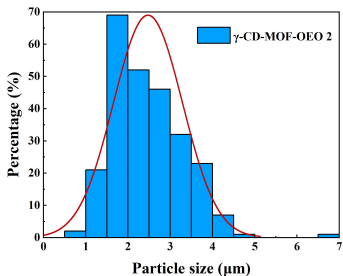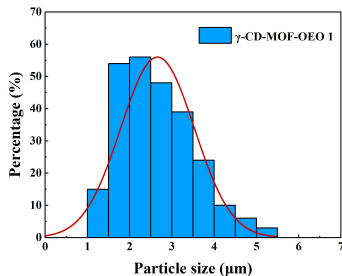

Supplement: d3nj00892d3.pdf [file d3nj00892d3.pdf]

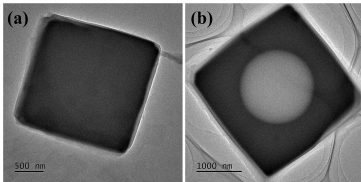

Supplement: d3nj00892d4.pdf [file d3nj00892d4.pdf]
